# Supplementary material
Source: publisher figshare collection journal article supplement (https://karger.figshare.com/articles/dataset/_/5128285)
Supplement: Supplementary file 1 [file 1]

**Original Article**

---

# **Gesundheitsförderung durch Stress- und Burnout-Prophylaxe mit ätherischen Ölen für alle Berufsgruppen im Wiener Otto-Wagner-Spital**

Wolfgang Steflitsch<sup>a</sup> Doris Steiner<sup>a</sup> Wilfried Peinhaupt<sup>a</sup>  
Beate Riedler<sup>b</sup> Michael Smuc<sup>c</sup> Gabrielle Diewald<sup>d</sup>

<sup>a</sup>2. Interne Lungenabteilung, Otto Wagner Spital, Wien, Österreich; <sup>b</sup>Tulln an der Donau, Österreich; <sup>c</sup>Zentrum für Kognition, Information und Management, Donau-Universität, Krems, Österreich; <sup>d</sup>Qualitätsmanagement, Stabstelle Gesundheitsförderung, Otto Wagner Spital, Wien, Österreich

---

Dr. Wolfgang Steflitsch  
2. Interne Lungenabteilung  
Otto-Wagner-Spital  
Sanatoriumstraße 2, 1140 Wien, Österreich  
wolfgang.steflitsch@chello.at

**KARGER**

**Tab. 6.** Körperliche Beeinträchtigungen durch Stress (SK 1–8)

|                        | Befragungszeitpunkt 1 |      |    | Befragungszeitpunkt 2 |      |    | Vergleich |             |       |
|------------------------|-----------------------|------|----|-----------------------|------|----|-----------|-------------|-------|
|                        | MW                    | SD   | n  | MW                    | SD   | n  | Diff      | t (df)      | p     |
| Teilnehmeranzahl       | 2,92                  | 0,64 | 88 | 2,66                  | 0,69 | 55 | 0,27      | 2,330 (141) | n.s.  |
| Frauen                 | 2,93                  | 0,65 | 74 | 2,64                  | 0,70 | 47 | 0,29      | 2,289 (119) | n.s.  |
| Männer                 |                       |      |    |                       |      |    |           |             |       |
| Pflegepersonal         | 2,99                  | 0,72 | 43 | 2,55                  | 0,73 | 32 | 0,44      | 2,592 (73)  | 0,036 |
| Arzt/Ärztin            |                       |      |    |                       |      |    |           |             |       |
| Sonstige Berufsgruppen | 2,95                  | 0,48 | 34 | 2,82                  | 0,64 | 22 | 0,13      | 0,874 (54)  | n.s.  |
| Alter                  |                       |      |    |                       |      |    |           |             |       |
| ≤49                    | 2,80                  | 0,62 | 51 | 2,61                  | 0,80 | 32 | 0,19      | 1,207 (81)  | n.s.  |
| ≤19                    |                       |      |    |                       |      |    |           |             |       |
| 20–39                  |                       |      |    |                       |      |    |           |             |       |
| 30–39                  |                       |      |    |                       |      |    |           |             |       |
| 40–49                  | 2,94                  | 0,55 | 31 | 2,85                  | 0,80 | 22 | 0,09      | 0,492 (51)  | n.s.  |
| ≥50                    | 3,15                  | 0,61 | 34 | 2,72                  | 0,52 | 23 | 0,43      | 2,782 (55)  | 0,025 |
| 50–59                  | 3,16                  | 0,63 | 28 | 2,60                  | 0,50 | 18 | 0,56      | 3,179 (44)  | 0,012 |
| ≥60                    |                       |      |    |                       |      |    |           |             |       |

MW = Mittelwert; SD = Standardabweichung; n.s. = nicht signifikant.

Einseitige Tests, korrigiert nach Holm-Bonferroni.

**Tab. 7.** Mentale und/oder psychische Beeinträchtigungen durch Stress (SM 1–15)

|                        | Befragungszeitpunkt 1 |       |    | Befragungszeitpunkt 2 |       |    | Vergleich |            |      |
|------------------------|-----------------------|-------|----|-----------------------|-------|----|-----------|------------|------|
|                        | MW                    | STABW | n  | MW                    | STABW | n  | Diff      | t (df)     | p    |
| Teilnehmeranzahl       | 2,75                  | 0,69  | 88 | 2,55                  | 0,70  | 55 | 0,20      | 1,714(141) | n.s. |
| Frauen                 | 2,83                  | 0,67  | 74 | 2,55                  | 0,71  | 47 | 0,27      | 2,117(119) | n.s. |
| Männer                 |                       |       |    |                       |       |    |           |            |      |
| Pflegepersonal         | 2,78                  | 0,73  | 43 | 2,45                  | 0,80  | 32 | 0,33      | 1,845(73)  | n.s. |
| Arzt/Ärztin            |                       |       |    |                       |       |    |           |            |      |
| Sonstige Berufsgruppen | 2,88                  | 0,57  | 34 | 2,67                  | 0,51  | 22 | 0,21      | 1,400(54)  | n.s. |
| Alter                  |                       |       |    |                       |       |    |           |            |      |
| ≤49                    | 2,70                  | 0,68  | 51 | 2,49                  | 0,76  | 32 | 0,20      | 1,274(81)  | n.s. |
| ≤19                    |                       |       |    |                       |       |    |           |            |      |
| 20–39                  |                       |       |    |                       |       |    |           |            |      |
| 30–39                  |                       |       |    |                       |       |    |           |            |      |
| 40–49                  | 2,91                  | 0,68  | 31 | 2,69                  | 0,78  | 22 | 0,22      | 1,122(51)  | n.s. |
| ≥50                    | 2,92                  | 0,62  | 34 | 2,63                  | 0,61  | 23 | 0,29      | 1,765(55)  | n.s. |
| 50–59                  | 2,93                  | 0,67  | 28 | 2,50                  | 0,56  | 18 | 0,43      | 2,246(44)  | n.s. |
| ≥60                    |                       |       |    |                       |       |    |           |            |      |

MW = Mittelwert; SD = Standardabweichung; n.s. = nicht signifikant.

Einseitige Tests, korrigiert nach Holm-Bonferroni.

**Tab. 8.** Soziale Beeinträchtigungen durch Stress (SS 1–4)

|                        | Befragungszeitpunkt 1 |      |    | Befragungszeitpunkt 2 |      |    | Vergleich |            |      |
|------------------------|-----------------------|------|----|-----------------------|------|----|-----------|------------|------|
|                        | MW                    | SD   | n  | MW                    | SD   | n  | Diff      | t (df)     | p    |
| Teilnehmeranzahl       | 2,86                  | 0,89 | 88 | 2,55                  | 0,85 | 55 | 0,30      | 2,022(141) | n.s. |
| Frauen                 | 2,92                  | 0,84 | 74 | 2,55                  | 0,88 | 47 | 0,37      | 2,311(119) | n.s. |
| Männer                 |                       |      |    |                       |      |    |           |            |      |
| Pflegepersonal         | 2,85                  | 0,90 | 43 | 2,61                  | 0,89 | 32 | 0,25      | 1,168(73)  | n.s. |
| Arzt/Ärztin            |                       |      |    |                       |      |    |           |            |      |
| Sonstige Berufsgruppen | 3,02                  | 0,83 | 34 | 2,50                  | 0,82 | 22 | 0,52      | 2,307(54)  | n.s. |
| Alter                  |                       |      |    |                       |      |    |           |            |      |
| ≤49                    | 2,73                  | 0,94 | 51 | 2,42                  | 0,87 | 32 | 0,31      | 1,500(81)  | n.s. |
| ≤19                    |                       |      |    |                       |      |    |           |            |      |
| 20–39                  |                       |      |    |                       |      |    |           |            |      |
| 30–39                  |                       |      |    |                       |      |    |           |            |      |
| 40–49                  | 2,94                  | 0,94 | 31 | 2,65                  | 0,92 | 22 | 0,30      | 1,134(51)  | n.s. |
| ≥50                    | 3,14                  | 0,70 | 34 | 2,74                  | 0,81 | 23 | 0,40      | 1,994(55)  | n.s. |
| 50–59                  | 3,15                  | 0,73 | 28 | 2,68                  | 0,78 | 18 | 0,23      | 2,074(44)  | n.s. |
| ≥60                    |                       |      |    |                       |      |    |           |            |      |

MW = Mittelwert; SD = Standardabweichung; n.s. = nicht signifikant.

Einseitige Tests, korrigiert nach Holm-Bonferroni.
