# Supplementary material
Source: publisher figshare collection journal article supplement (https://karger.figshare.com/articles/dataset/_/5128285)
Supplement: Supplementary file 2 [file 1]

**Original Article**

---

# Gesundheitsförderung durch Stress- und Burnout-Prophylaxe mit ätherischen Ölen für alle Berufsgruppen im Wiener Otto-Wagner-Spital

Wolfgang Steflitsch<sup>a</sup> Doris Steiner<sup>a</sup> Wilfried Peinhaupt<sup>a</sup>  
Beate Riedler<sup>b</sup> Michael Smuc<sup>c</sup> Gabrielle Diewald<sup>d</sup>

<sup>a</sup>2. Interne Lungenabteilung, Otto Wagner Spital, Wien, Österreich; <sup>b</sup>Tulln an der Donau, Österreich; <sup>c</sup>Zentrum für Kognition, Information und Management, Donau-Universität, Krems, Österreich; <sup>d</sup>Qualitätsmanagement, Stabstelle Gesundheitsförderung, Otto Wagner Spital, Wien, Österreich

---

Dr. Wolfgang Steflitsch  
2. Interne Lungenabteilung  
Otto-Wagner-Spital  
Sanatoriumstraße 2, 1140 Wien, Österreich  
wolfgang.steflitsch@chello.at

**KARGER**

**Appendix I. Fragebogen zum Befragungszeitpunkt 1 (ZP1) und 2 (ZP2)**

| FB Nr. |                                                                                                              | trifft voll und ganz zu | trifft eher zu | weder noch | trifft nicht zu | trifft überhaupt nicht zu |
|--------|--------------------------------------------------------------------------------------------------------------|-------------------------|----------------|------------|-----------------|---------------------------|
| SK1    | Sind Sie tagsüber oft müde und erschöpft, obwohl Sie ausreichend Schlaf hatten?                              | ⑤                       | ④              | ③          | ②               | ①                         |
| SM1    | Haben Sie Probleme, abends oder am Wochenende abzuschalten?                                                  | ⑤                       | ④              | ③          | ②               | ①                         |
| SK2    | Sind Sie anfällig für Infektionen wie eine Grippe und Erkältungen?                                           | ⑤                       | ④              | ③          | ②               | ①                         |
| SM2    | Trinken Sie mehr Alkohol als früher, um abzuschalten?                                                        | ⑤                       | ④              | ③          | ②               | ①                         |
| SK3    | Können Sie schlecht einschlafen und/oder wachen nachts häufiger auf?                                         | ⑤                       | ④              | ③          | ②               | ①                         |
| SM3    | Können Sie sich schlecht konzentrieren und verlieren häufig bei Gesprächen den Faden.                        | ⑤                       | ④              | ③          | ②               | ①                         |
| SM4    | Fühlen Sie sich, mehr als früher, im Job überfordert und haben das Gefühl, alles wächst Ihnen über den Kopf? | ⑤                       | ④              | ③          | ②               | ①                         |
| SM5    | Reagieren Sie gereizt und aggressiv, wenn etwas nicht so läuft, wie geplant?                                 | ⑤                       | ④              | ③          | ②               | ①                         |
| SK4    | Leiden Sie häufiger als früher unter Kopfschmerzen, einem nervösen Magen oder Herzklopfen?                   | ⑤                       | ④              | ③          | ②               | ①                         |
| SM6    | Fühlen Sie sich öfters in Situationen des Alltags ohnmächtig/ oder ausgeliefert?                             | ⑤                       | ④              | ③          | ②               | ①                         |
| SM7    | Nerven Sie die Fliege an der Wand oder ein klingelndes Telefon mehr als früher?                              | ⑤                       | ④              | ③          | ②               | ①                         |
| SS1    | Ziehen Sie sich von Freunden zurück und meiden gesellige Treffen?                                            | ⑤                       | ④              | ③          | ②               | ①                         |
| SM8    | Fühlen Sie sich ausgelaugt und ausgebrannt und haben das Gefühl, allem nicht mehr gewachsen zu sein?         | ⑤                       | ④              | ③          | ②               | ①                         |
| SM9    | Ertappen Sie sich oft bei aggressiven Gedanken und Vorstellungen, die sich gegen andere richten?             | ⑤                       | ④              | ③          | ②               | ①                         |
| SM10   | Haben Sie Angst, die Kontrolle über sich oder Ihr Verhalten zu verlieren?                                    | ⑤                       | ④              | ③          | ②               | ①                         |
| SM11   | Können Sie sich nicht mehr entspannen, sondern stehen ständig unter Strom?                                   | ⑤                       | ④              | ③          | ②               | ①                         |
| SS2    | Vernachlässigen Sie schon längere Zeit Ihre Freunde und/oder Ihre Hobbys?                                    | ⑤                       | ④              | ③          | ②               | ①                         |
| SS3    | Behalten Sie Ihre Sorgen lieber für sich, als mit anderen darüber zu sprechen?                               | ⑤                       | ④              | ③          | ②               | ①                         |
| SS4    | Äußern sich Freunde oder Ihr Partner besorgt um Ihre Gesundheit?                                             | ⑤                       | ④              | ③          | ②               | ①                         |
| SM12   | Brechen Sie leicht in Tränen aus oder fühlen sich schnell gekränkt?                                          | ⑤                       | ④              | ③          | ②               | ①                         |
| SK5    | Greifen Sie oft zu Süßigkeiten und Fast Food?                                                                | ⑤                       | ④              | ③          | ②               | ①                         |
| SK6    | Trinken Sie am Tag mehr als drei Tassen Kaffee?                                                              | ⑤                       | ④              | ③          | ②               | ①                         |
| SK7    | Rauchen Sie wesentlich mehr wie früher?                                                                      | ⑤                       | ④              | ③          | ②               | ①                         |
| SK8    | Greifen Sie zu Beruhigungs-/ Schlafmitteln oder Psychopharmaka?                                              | ⑤                       | ④              | ③          | ②               | ①                         |
| SM13   | Tun Sie sich momentan schwer, Entscheidungen zu treffen?                                                     | ⑤                       | ④              | ③          | ②               | ①                         |
| SM14   | Haben Sie Angst vor der Zukunft?                                                                             | ⑤                       | ④              | ③          | ②               | ①                         |
| SM15   | Sehen Sie sich als Versager, der nicht mit seinem Leben klarkommt?                                           | ⑤                       | ④              | ③          | ②               | ①                         |

Item SK 1-8 = Körperlich bedingte Beeinträchtigungen durch Stress

Item SM 1-15 = Mentale und/oder psychisch bedingte Beeinträchtigungen durch Stress

Item SS 1-4 = Sozial bedingte Beeinträchtigungen durch Stress
